# Supplementary material for: Improvement of Nutraceutical Value of Parsley Leaves (Petroselinum crispum) upon Field Applications of Beneficial Microorganisms
Source: MDPI journal article supplement (doi:10.3390/horticulturae7090281), 2021-09-03
Supplement: s1 [file s1]

## Article

# Supplementary materials: Improvement of Nutraceutical Value of Parsley Leaves (*Petroselinum crispum*) upon Field Applications of Beneficial Microorganisms

Alessia Staropoli<sup>1,2\*</sup>, Anastasia Vasseti<sup>1</sup>, Maria Michela Salvatore<sup>3</sup>, Anna Andolfi<sup>3,4</sup>, Maria Isabella Prigigallo<sup>5</sup>, Giovanni Bubici<sup>5</sup>, Marina Scagliola<sup>6</sup>, Pasquale Salerno<sup>6</sup> and Francesco Vinale<sup>2,4,7</sup>

**TableS1.** Metabolites obtained from LC-MS data (positive mode), that are differentially accumulated in plants treated with *Streptomyces* (S), *Trichoderma* (T) or a mix of those two (S+T) compared to control group (C) plants and the microbial consortium (S+T) compared to *Streptomyces* (S), *Trichoderma* (T) single culture.

| Compound                                                        | Mass (Da) | Ln (Fold Change) |              |              |              |             |
|-----------------------------------------------------------------|-----------|------------------|--------------|--------------|--------------|-------------|
|                                                                 |           | S vs. C          | T vs. C      | S+T vs. C    | S+T vs S     | S+T vs T    |
| Styrene                                                         | 104.0627  | 21,233128        | 21,28731     | -0,074560165 | -21,307688   | -21,36187   |
| C <sub>11</sub> H <sub>23</sub> O                               | 185.1782  | -20,871048       | -10,715798   | -20,77758    | 0,09346771   | -10,061782  |
| Bergaptol/ Xanthotoxol*                                         | 202.0272  | 20,277876        | 19,712917    | 20,48061     | 0,20273292   | 0,76769114  |
| Xanthotoxin/Bergapthen*                                         | 216.0427  | 20,23557         | 20,004814    | 20,39623     | 0,1606602    | 0,3914169   |
| Rotundine B                                                     | 233.1789  | 20,003548        | 20,18695     | 20,114727    | 0,11117959   | -0,0722242  |
| C <sub>10</sub> H <sub>19</sub> NO <sub>7</sub>                 | 265.1172  | -3,6536846       | 0,057913303  | -3,7408605   | -0,087175846 | -3,7987738  |
| C <sub>16</sub> H <sub>35</sub> NO <sub>2</sub>                 | 273.2676  | 20,174923        | 20,127983    | 20,177908    | 0,002984881  | 0,04992515  |
| Petroselinic acid                                               | 282.257   | 0,6994004        | 0,8276119    | -1,1479632   | -1,8473636   | -1,9755751  |
| C <sub>20</sub> H <sub>35</sub> NO <sub>2</sub>                 | 321.2681  | -4,3183737       | -0,006582439 | -1,0713919   | 3,2469816    | -1,0648096  |
| Hyperjovinol B                                                  | 332.198   | -19,221182       | -0,99390304  | -0,743564    | 18,477617    | 0,25033903  |
| C <sub>22</sub> H <sub>43</sub> NO                              | 337.3358  | 19,672241        | 19,617838    | 19,652145    | -0,020095706 | 0,034308046 |
| Piperochromanoic acid                                           | 356.198   | 18,248592        | 18,527262    | -0,074560165 | -18,323153   | -18,601822  |
| C <sub>17</sub> H <sub>39</sub> N <sub>4</sub> O <sub>3</sub> S | 379.274   | 19,704937        | 19,600945    | 19,81222     | 0,10728264   | 0,2112735   |
| C <sub>19</sub> H <sub>25</sub> N <sub>5</sub> O <sub>6</sub>   | 419.1808  | 18,70136         | 18,571812    | 18,785557    | 0,08419633   | 0,21374518  |
| C <sub>25</sub> H <sub>34</sub> N <sub>4</sub> O <sub>2</sub>   | 422.2688  | -1,0106063       | -0,5555207   | -0,5077439   | 0,50286233   | 0,04777682  |
| C <sub>23</sub> H <sub>35</sub> N <sub>5</sub> O <sub>3</sub>   | 429.2746  | -0,821465        | -1,3801929   | -1,2259859   | -0,40452087  | 0,15420699  |
| C <sub>26</sub> H <sub>49</sub> N <sub>2</sub> O <sub>3</sub>   | 437.3739  | -3,9967847       | -0,4573155   | -0,22560757  | 3,771177     | 0,23170793  |
| C <sub>24</sub> H <sub>42</sub> O <sub>7</sub>                  | 442.2926  | 19,269941        | 19,148727    | 19,439392    | 0,16945037   | 0,29066512  |
| C <sub>25</sub> H <sub>49</sub> N <sub>5</sub> O <sub>2</sub>   | 451.3895  | 18,932167        | 19,004044    | 18,864655    | -0,06751266  | -0,13938913 |
| C <sub>27</sub> H <sub>41</sub> N <sub>2</sub> O <sub>4</sub>   | 457.306   | -2,0492868       | 2,9139493    | -2,982212    | -0,9329252   | -5,896161   |
| C <sub>25</sub> H <sub>32</sub> N <sub>7</sub> O <sub>2</sub>   | 462.2614  | -0,16802788      | 17,894062    | -0,074560165 | 0,09346771   | -17,968622  |
| C <sub>25</sub> H <sub>49</sub> N <sub>5</sub> O <sub>3</sub>   | 467.3844  | -0,06121111      | 5,6531143    | 2,6398673    | 2,7010784    | -3,013247   |
| 495.3346                                                        | 495.3346  | 0,34400874       | -0,8140577   | -0,6760938   | -1,0201025   | 0,13796389  |
| C <sub>27</sub> H <sub>53</sub> N <sub>5</sub> O <sub>3</sub>   | 495.4159  | -1,4102228       | -1,3853886   | -1,4837484   | -0,07352567  | -0,09835982 |
| C <sub>28</sub> H <sub>49</sub> N <sub>9</sub>                  | 511.411   | -1,1269317       | -0,7952111   | -1,2407053   | -0,113773584 | -0,44549417 |
| C <sub>30</sub> H <sub>57</sub> N <sub>2</sub> O <sub>5</sub>   | 525.4262  | -14,094639       | 3,4324927    | -2,1690602   | 11,925578    | -5,601553   |
| C <sub>31</sub> H <sub>59</sub> N <sub>2</sub> O <sub>5</sub>   | 539.4424  | 14,300248        | 12,014479    | 16,880615    | 2,5803668    | 4,8661366   |
| C <sub>23</sub> H <sub>28</sub> N <sub>10</sub> O <sub>6</sub>  | 540.2202  | -0,16802788      | 16,675978    | 14,77404     | 14,942068    | -1,9019375  |
| C <sub>30</sub> H <sub>53</sub> N <sub>9</sub> O                | 555.4371  | -0,16802788      | -0,30589485  | 20,052979    | 20,221006    | 20,358873   |

|                                                               |          |             |             |             |             |           |
|---------------------------------------------------------------|----------|-------------|-------------|-------------|-------------|-----------|
| Capsanthone                                                   | 582.4098 | -0,16802788 | -0,30589485 | 18,509792   | 18,67782    | 18,815687 |
| C <sub>33</sub> H <sub>63</sub> N <sub>2</sub> O <sub>7</sub> | 599.4639 | -0,16802788 | -0,30589485 | 18,49334    | 18,661367   | 18,799234 |
| C <sub>33</sub> H <sub>59</sub> N <sub>9</sub> O <sub>2</sub> | 613.4796 | 17,773788   | -0,30589485 | 17,48442    | -0,28936672 | 17,790316 |
| C <sub>33</sub> H <sub>51</sub> N <sub>2</sub> O <sub>9</sub> | 619.3597 | -18,611687  | -18,749554  | -4,055524   | 14,556163   | 14,69403  |
| C <sub>37</sub> H <sub>48</sub> N <sub>4</sub> O <sub>5</sub> | 628.3615 | -17,749094  | -17,886961  | -0,40953028 | 17,339563   | 17,47743  |
| Isorhamnetin 3,7-di-O-beta-glucopyranoside                    | 640.1663 | -0,47018123 | -17,639072  | -0,5747576  | -0,10457635 | 17,064314 |
| C <sub>32</sub> H <sub>28</sub> NO <sub>14</sub>              | 650.1525 | 9,430138    | -0,30589485 | 2,0435104   | -7,386627   | 2,3494053 |

\* Stereoisomers for which it was not possible to make a distinction in the chromatogram.

**TableS2.** Metabolites obtained from LC-MS data (negative mode), that are differentially accumulated in plants treated with *Streptomyces* (S), *Trichoderma* (T) or a mix of those two (S+T) compared to control group (C) plants and the microbial consortium (S+T) compared to *Streptomyces* (S), *Trichoderma* (T) single culture.

| Compound                                                       | Mass (Da) | Ln (Fold Change) |            |             |             |             |
|----------------------------------------------------------------|-----------|------------------|------------|-------------|-------------|-------------|
|                                                                |           | S vs. C          | T vs. C    | S+T vs. C   | S+T vs S    | S+T vs T    |
| Quinic acid                                                    | 192.0642  | 19.887115        | 20.968676  | 20.24096    | 0.35384262  | -0.72771645 |
| (Z,Z,Z)-Octadeca-9,12,15-trienoic acid                         | 278.2252  | -0.08422239      | -19.020306 | -19.298847  | -19.214624  | -0.27854156 |
| Nordihydrocapsiate                                             | 294.1834  | 18.09749         | 0.2026043  | -0.07593727 | -18.173428  | -0.27854156 |
| Colneleic acid                                                 | 294.2201  | 19.09545         | 0.2026043  | 18.635998   | -0.45945194 | 18.433393   |
| Sucrose                                                        | 342.1182  | -21.005697       | -20.720173 | -0.5616127  | 20.444084   | 20.15856    |
| C <sub>26</sub> H <sub>20</sub> NO <sub>2</sub>                | 378.1503  | 0.082920074      | 18.693682  | -0.07593727 | 0.006982803 | -18.769619  |
| C <sub>12</sub> H <sub>18</sub> N <sub>3</sub> O <sub>11</sub> | 380.0935  | 3.77224          | 6.3687778  | 6.334033    | 2.561793    | -0.03474465 |
| C <sub>11</sub> H <sub>12</sub> N <sub>10</sub> O <sub>6</sub> | 380.0954  | 13.355883        | -2.281044  | -3.8360806  | -17.191963  | -1.5550365  |
| C <sub>12</sub> H <sub>18</sub> N <sub>7</sub> O <sub>8</sub>  | 388.1225  | -2.89076         | 0.17742908 | -0.07747638 | 2.8132834   | -0.25490546 |
| C <sub>12</sub> H <sub>34</sub> N <sub>8</sub> O <sub>10</sub> | 450.2387  | 0.082920074      | 18.759348  | -0.07593727 | 0.006982803 | -18.835285  |
| Cilistol a                                                     | 456.2852  | 0.066390194      | -19.038605 | -19.317146  | -19.383537  | -0.27854156 |
| C <sub>23</sub> H <sub>40</sub> O <sub>9</sub>                 | 460.2677  | 18.33072         | 0.2026043  | 18.438322   | 0.107599616 | 18.235718   |
| C <sub>23</sub> H <sub>46</sub> O <sub>9</sub>                 | 466.3147  | 19.192417        | 0.2026043  | -0.07593727 | -19.268354  | -0.27854156 |
| C <sub>28</sub> H <sub>34</sub> N <sub>3</sub> O <sub>4</sub>  | 476.254   | -6.595832        | -6.3103075 | 12.653781   | 19.249613   | 18.964088   |
| C <sub>28</sub> H <sub>36</sub> N <sub>3</sub> O <sub>4</sub>  | 478.2696  | 18.70491         | 18.73321   | -0.07593727 | -18.780848  | -18.809147  |
| C <sub>19</sub> H <sub>28</sub> N <sub>16</sub>                | 480.2688  | 0.082920074      | 19.755817  | -0.07593727 | 0.006982803 | -19.831755  |
| C <sub>25</sub> H <sub>42</sub> O <sub>9</sub>                 | 486.2836  | 0.082920074      | 0.2026043  | -0.07593727 | 0.006982803 | -0.27854156 |
| C <sub>26</sub> H <sub>40</sub> N <sub>4</sub> O <sub>5</sub>  | 488.2988  | 18.616465        | 18.807993  | 18.677116   | 0.06065011  | -0.13087809 |
| C <sub>18</sub> H <sub>43</sub> N <sub>5</sub> O <sub>10</sub> | 489.3026  | 18.68542         | 0.2026043  | 19.84922    | 1.1638017   | 19.646616   |
| C <sub>26</sub> H <sub>39</sub> N <sub>8</sub> O <sub>4</sub>  | 527.3091  | 2.832656         | 4.009903   | 3.584489    | 0.7518332   | -0.42541403 |
| C <sub>19</sub> H <sub>34</sub> O <sub>17</sub>                | 534.1816  | -19.257658       | -18.972134 | -19.250675  | 0.006982803 | -0.27854156 |
| C <sub>25</sub> H <sub>36</sub> N <sub>10</sub> O <sub>5</sub> | 556.2872  | -0.75310814      | 0.20781177 | -0.25587013 | 0.49723804  | -0.4636819  |
| 565.152                                                        | 565.152   | 0.082920074      | 19.403019  | 19.307016   | 19.389936   | -0.09600169 |
| C <sub>32</sub> H <sub>40</sub> N <sub>7</sub> O <sub>4</sub>  | 586.3147  | 0.08443248       | 0.45108438 | 0.009214163 | -0.07521832 | -0.4418702  |
| 606.1595                                                       | 606.1595  | 18.048233        | 18.294506  | 17.79564    | -0.25259352 | -0.4988656  |
| C <sub>24</sub> H <sub>17</sub> N <sub>15</sub> O <sub>7</sub> | 627.1443  | -18.992393       | 0.46386808 | 0.08813183  | 19.080526   | -0.37573624 |
| C <sub>30</sub> H <sub>18</sub> N <sub>10</sub> O <sub>7</sub> | 630.1358  | -18.92042        | 0.53584146 | -18.913437  | 0.006982803 | -19.44928   |
| Kaempferol 3-(6"-acetylgalactoside)-7-rhamnoside               | 636.1695  | 0.082920074      | 17.88488   | -0.07593727 | 0.006982803 | -17.960817  |

|                         |          |             |            |             |             |             |
|-------------------------|----------|-------------|------------|-------------|-------------|-------------|
| $C_{30}H_{30}O_{18}$    | 678.1471 | -6.8933015  | -1.3959728 | -1.2626923  | 5.6306095   | 0.13328058  |
| $C_{31}H_{28}N_4O_{14}$ | 680.1591 | -0.16431296 | -18.937742 | -0.00396993 | 0.16034304  | 18.933771   |
| $C_{29}H_{30}N_3O_{18}$ | 708.152  | -18.679964  | -18.39444  | -18.672981  | 0.006982803 | -0.27854156 |

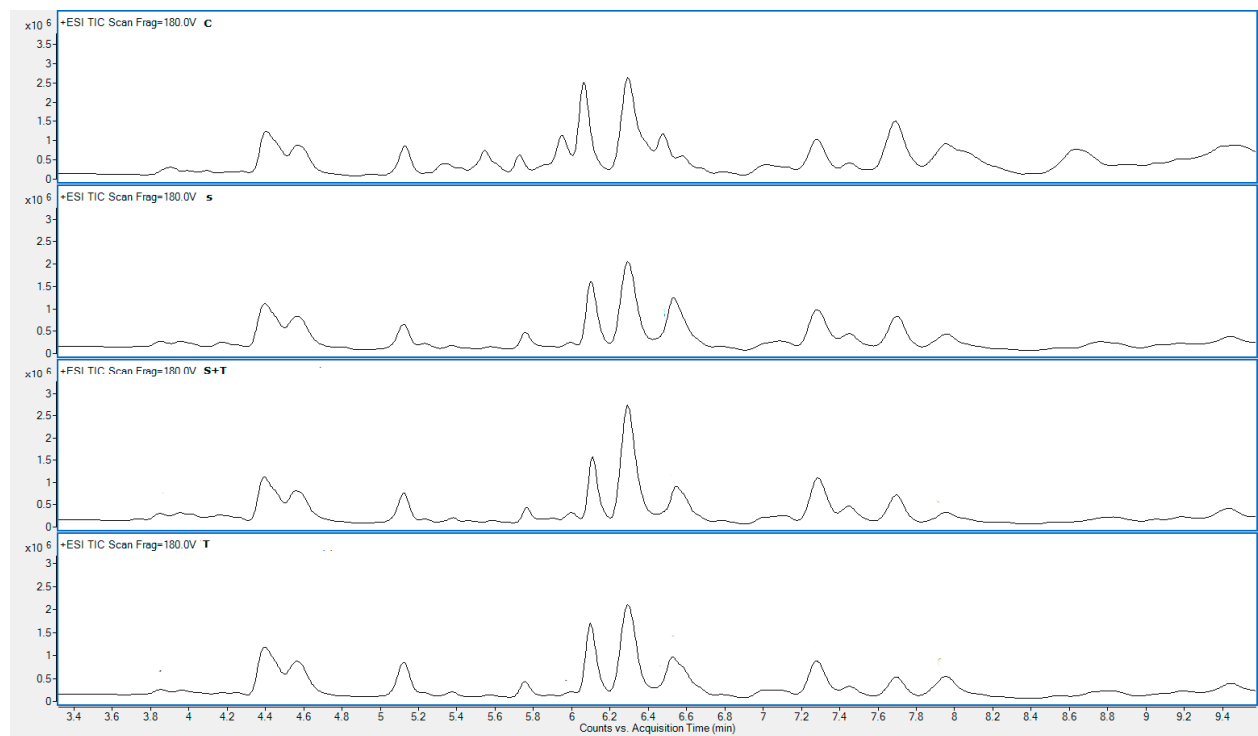

**FigureS1.** Magnified total ion chromatogram of parsley extracts recorded in positive mode. From the top to the bottom: C is control group; S is *Streptomyces* group; S+T is the microbial consortium *Streptomyces* + *Trichoderma*; T is *Trichoderma* group.

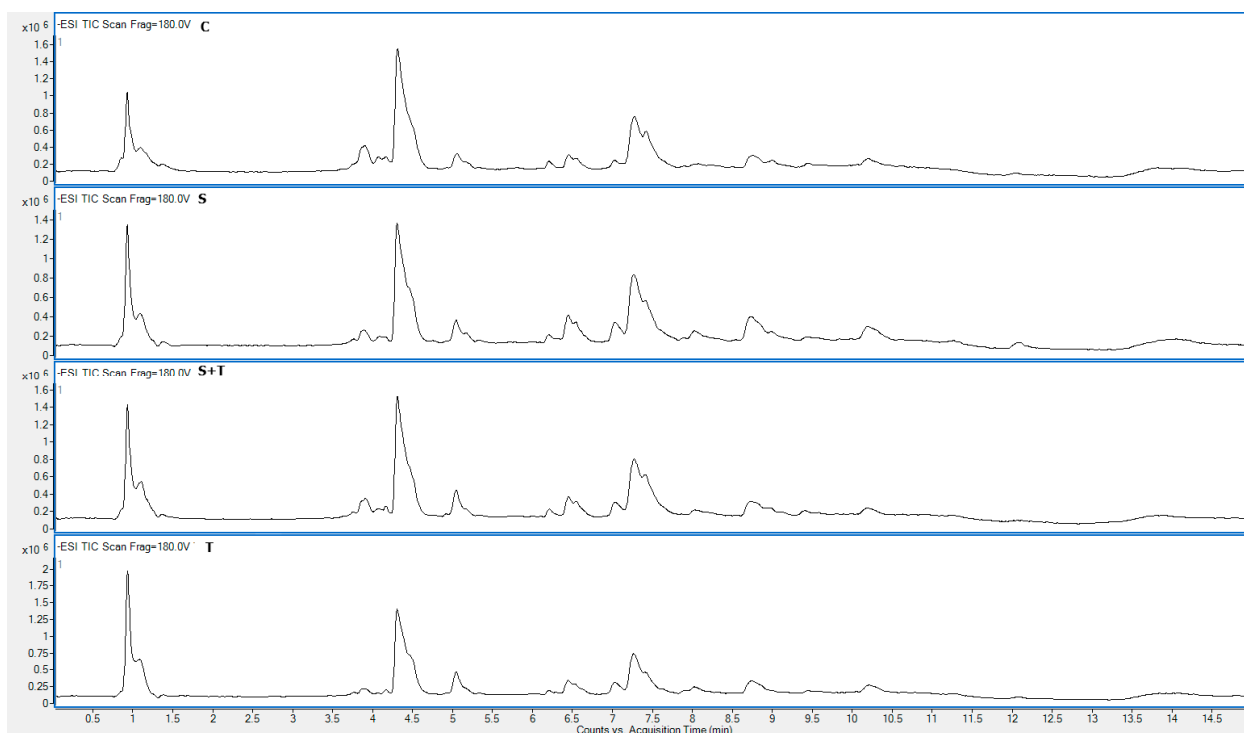

**FigureS2.** Total ion chromatogram of parsley extracts recorded in negative mode. From the top to the bottom: C is control group; S is *Streptomyces* group; S+T is the microbial consortium *Streptomyces* + *Trichoderma*; T is *Trichoderma* group.

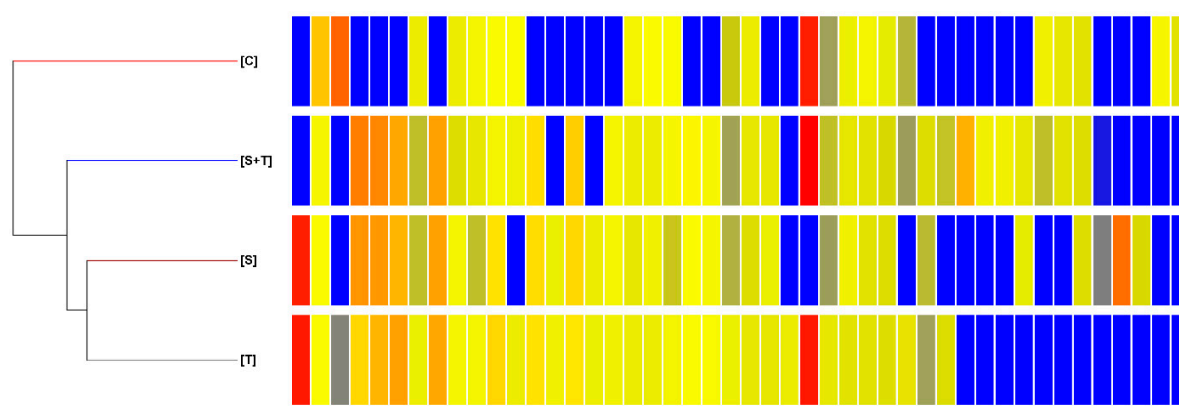

**FigureS3.** Hierarchical clustering heatmap of statistically different metabolites in control (C) group; microbial consortium of *Streptomyces* and *Trichoderma* (S+T) group; *Streptomyces* (S) group and *Trichoderma* (T) group. This result is obtained starting from LC-MS data recorded in positive mode and subjected to statistical analysis (one-way ANOVA  $p < 0.05$  and fold change  $> 2.0$ ).

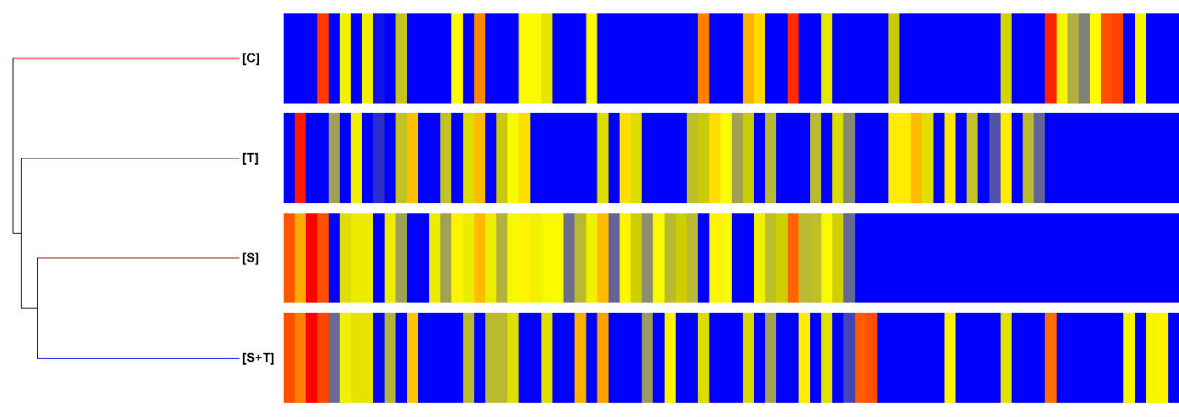

**FigureS4.** Hierarchical clustering heatmap of statistically different metabolites in control (C) group; microbial consortium of *Streptomyces* and *Trichoderma* (S+T) group; *Streptomyces* (S) group and *Trichoderma* (T) group. This result is obtained starting from LC-MS data recorded in negative mode and subjected to statistical analysis (one-way ANOVA  $p < 0.05$  and fold change  $> 2.0$ ).
